# Supplementary material
Source: PubMed Central journal article supplement (PMC2662553)
Supplement: JCI36693sd.pdf [file JCI36693sd.pdf]

## Supplemental Figure 1

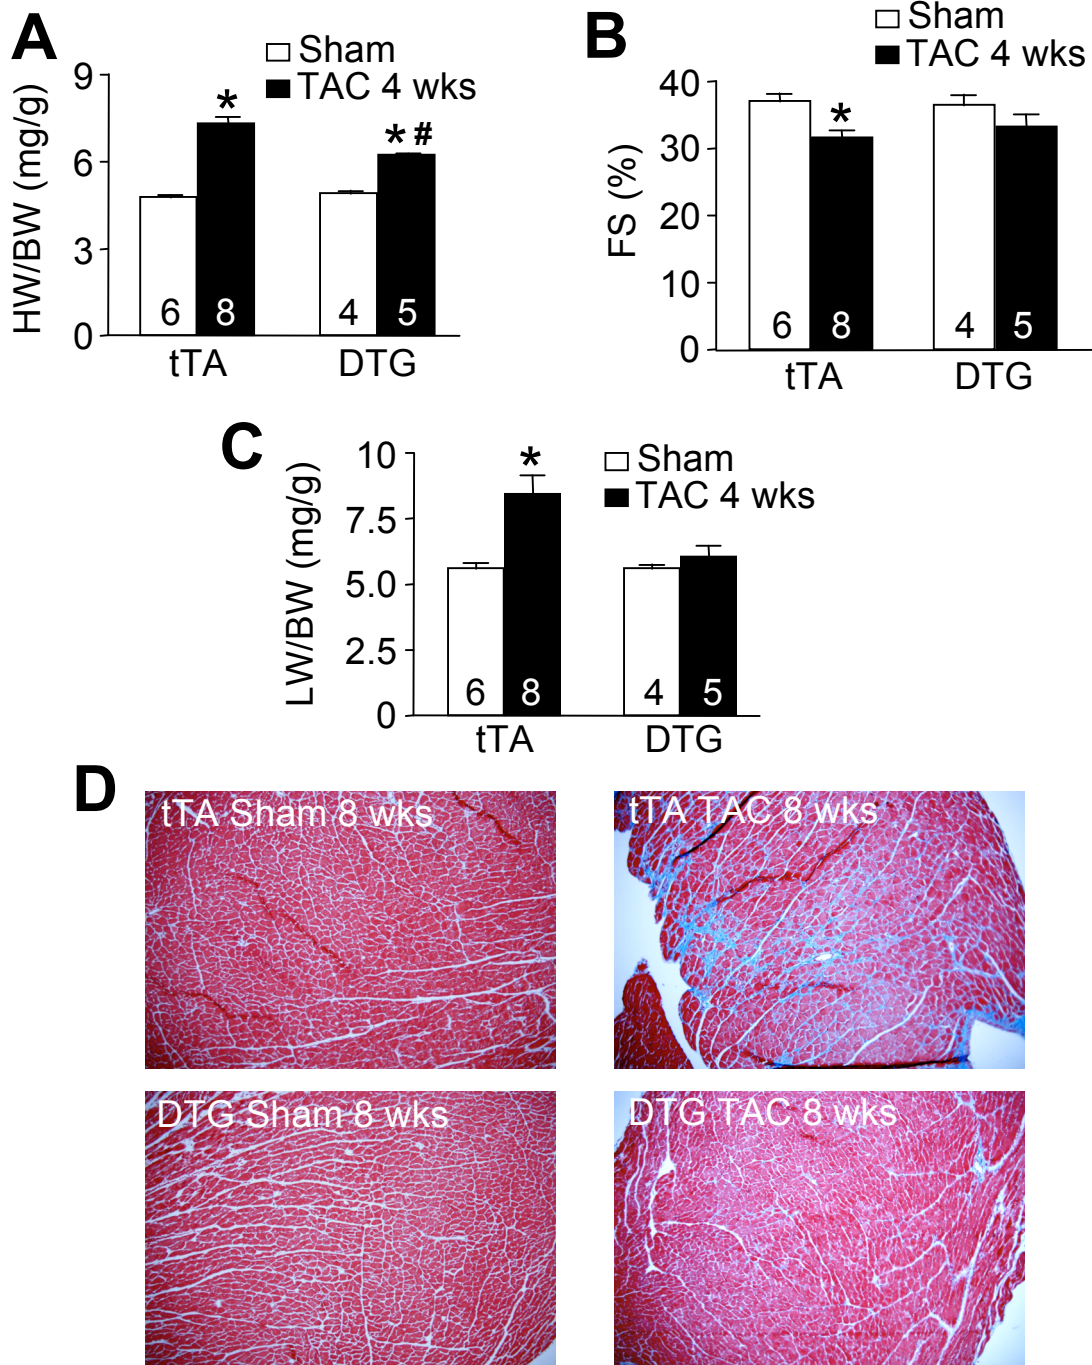

**Fig.** Assessment of hypertrophy and heart failure in PMCA4b transgenic mice. **(A)** Heart weight normalized to body weight after 4 weeks of TAC in control (tTA) or double transgenic (DTG) PMCA4b expressing mice. DTG mice showed less hypertrophy than tTA controls ( $\#P < 0.05$ ). **(B)** Fractional shortening (FS%) in control and DTG mice after 4 weeks of TAC. Control mice showed a slight but significant reduction in function that was not seen in DTG mice ( $*P < 0.05$ ). **(C)** Lung weight normalized to body weight after 4 weeks of TAC. Control mice but not DTG mice showed edema ( $*P < 0.05$ ). **(D)** Trichrome histology of hearts after 8 weeks of TAC or sham procedure. PMCA4b expressing DTG mice showed less fibrosis (blue staining).
